# Supplementary material for: β-arrestin-2 regulates NMDA receptor function in spinal lamina II neurons and duration of persistent pain
Source: PubMed Central journal article supplement (PMC5477285; doi:10.1038/ncomms12531), 2016-08-19
Supplement: ncomms12531-s1.pdf [file ncomms12531-s1.pdf]

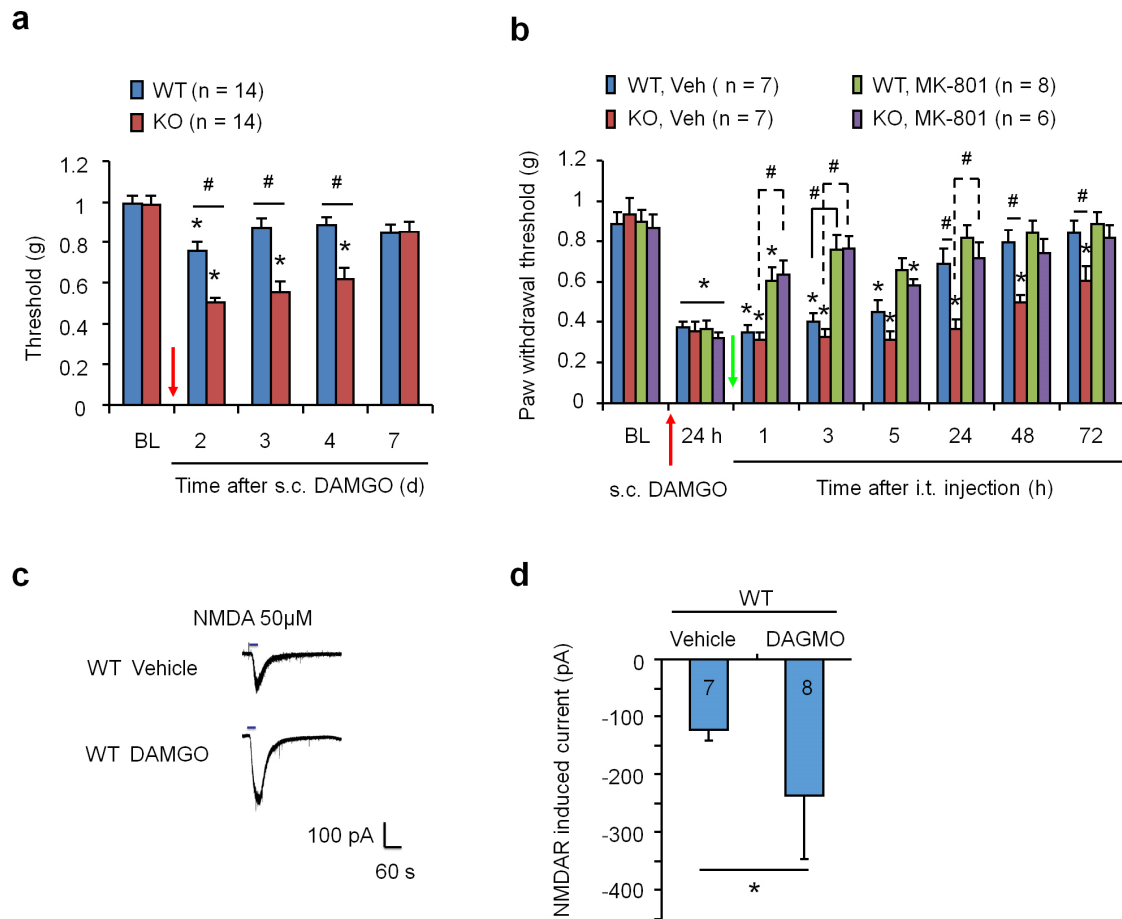

**Supplementary Figure 1. Mechanical allodynia and spinal NMDA currents in WT and *Arrb2* KO mice**

**(a)** Mechanical allodynia following DAMGO injection (1 mg/kg, s.c.) is potentiated and prolonged in *Arrb2*-KO mice.  $*P < 0.05$ , vs. baseline (BL),  $\#P < 0.05$ , vs. WT, Two-Way ANOVA.  $n = 14$  mice/group. **(b)** Subcutaneous DAMGO (1 mg/kg, i.p.) induced mechanical allodynia is blocked by spina administration of NMDAR antagonist MK-801 (i.t., 10 nmol) in WT and KO mice.  $*P < 0.05$ , vs. BL,  $\#P < 0.05$ . Two-Way ANOVA,  $n = 6-8$  mice/group. **(c, d)** NMDA-induced current in lamina IIo neurons of spinal cord slices is enhanced in WT mice 24 h after DAMGO treatment. **(c)** Representative traces of NMDA (50  $\mu$ M) induced current in lamina IIo neurons from vehicle (saline) treated WT mice at 24 h. **(d)** Amplitude of NMDA-induced currents in WT mice.  $*P < 0.05$ , student's t-test,  $n = 7, 8$  neurons/group (shown in each column). All data are expressed as mean  $\pm$  S.E.M.

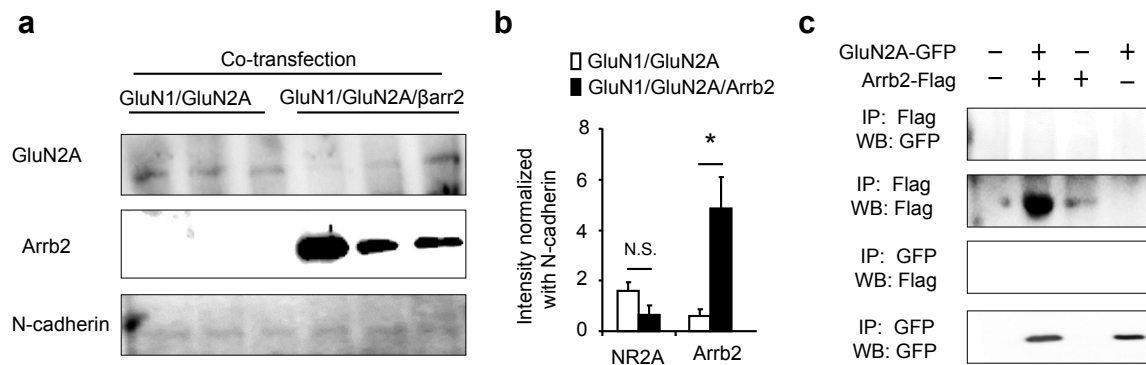

**Supplementary Figure 2. Arrb2 is not associated with GluN2A in HeLa cells**

(a) Surface expression of GluN2A and Arrb2 in HeLa cells transfected with GluN1/GluN2A and GluN1/GluN2A/Arrb2. Note that Arrb2 does not regulate GluN2A surface expression in HeLa cells. (b) Relative expression levels of GluN2A and Arrb2, normalized with N-cadherin. \* $P < 0.05$ , student's t-test, N.S., no significance.  $n = 3$  cultures/group. (c) Absence of co-IP of Arrb2 with GluN2A in HeLa cells. All data are expressed as mean  $\pm$  S.E.M.

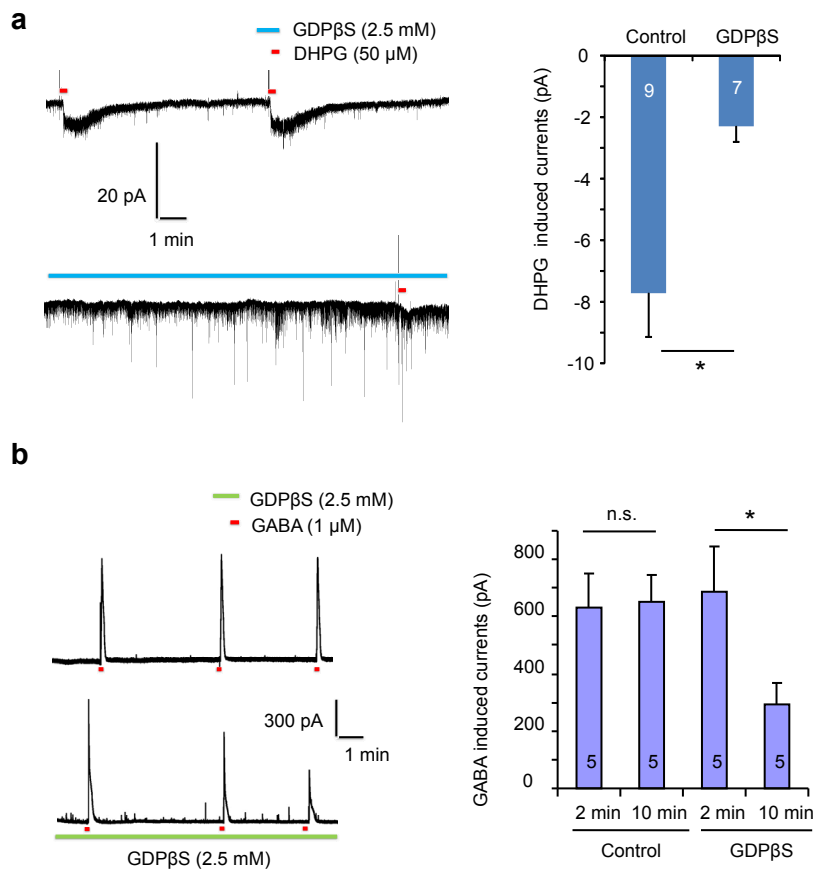

**Supplementary Figure 3.** Effects of GDPβS on DHPG and GABA-induced currents in spinal lamina IIo neurons of WT mice.

(a) Inhibition of mGluR agonist DHPG (50 μM) induced inward currents by GDPβS (2.5 mM) through intracellular delivery via a recording pipette. Right, amplitude of DHPG-induced currents before and after GDPβS treatment. \* $P < 0.05$ , student's t-test,  $n = 7, 9$  neurons/group. (b) Inhibition of GABA (1 μM) induced outward currents by GDPβS (2.5 mM) through intracellular delivery via a recording pipette. Right, amplitude of GABA-induced currents. \* $P < 0.05$ , student's t-test. N.S., no significance.  $n = 5$  neurons/group. Note there is time-dependent inhibition of GABA current. GDPβS effectively inhibits G-protein signaling in lamina IIo neurons of spinal cord slices following bath application of DHPG and GABA. All data are expressed as mean  $\pm$  S.E.M.

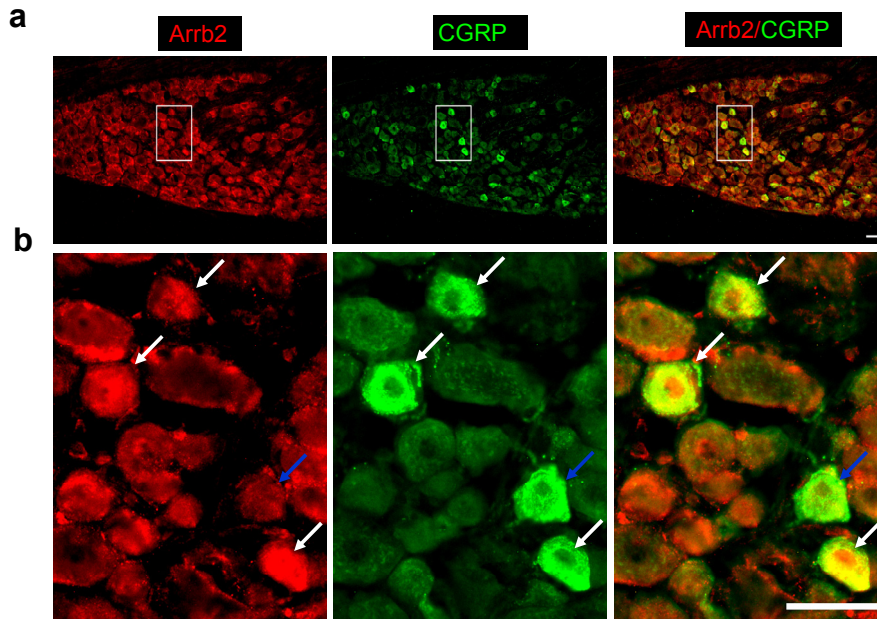

**Supplementary Figure 4.** Arrb2 expression in DRG sensory neurons of rats.

(a) Double staining shows colocalization of Arrb2 and CGRP in DRG neurons. Scales, 20  $\mu\text{m}$ . (b) Enlarged boxes from a. White arrows show double-labeled neurons. Scale, 50  $\mu\text{m}$ .

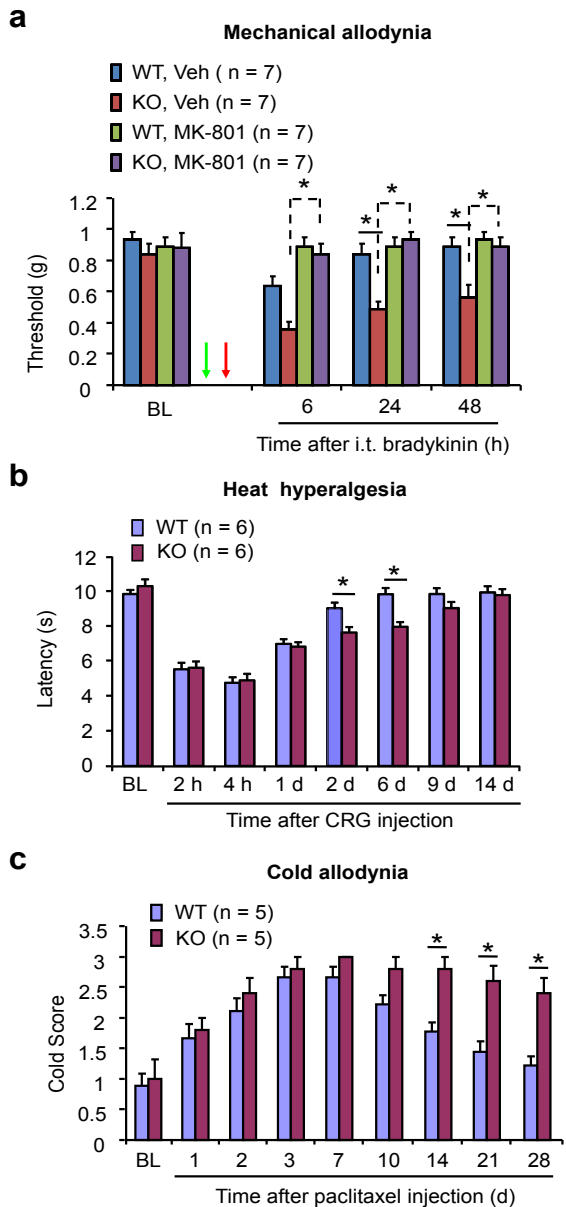

**Supplementary Figure 5.** Inflammatory and neuropathic pain in WT and *Arrb2* KO mice.

**(a)** Mechanical allodynia by i.t. bradykinin (1  $\mu$ g, indicated by red arrow) is enhanced and prolonged in KO mice and prevented by blocking NMDAR with MK-801 (i.t., 10 nmol).  $*P < 0.05$ , two-way ANOVA,  $n = 7$  mice/group. **(b)** Carrageenan-induced heat hyperalgesia is prolonged in KO mice.  $*P < 0.05$ , two-way ANOVA,  $n = 6$  mice/group. **(c)** Paclitaxel-induced cold allodynia is also prolonged in KO mice  $*P < 0.05$ , Two-Way ANOVA, followed by post-hoc Bonferroni test,  $n = 5$  mice/group. All data are expressed as mean  $\pm$  S.E.M.

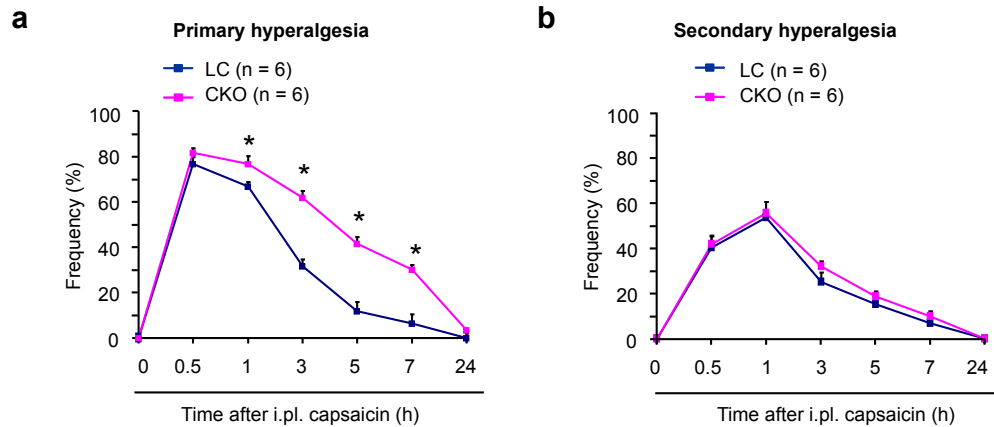

**Supplementary Figure 6.** Capsaicin-induced 1<sup>st</sup> and 2<sup>nd</sup> hyperalgesia/allodynia in WT mice and *Arrb2* conditional knockout (CKO) mice.

**(a, b)** Intraplantar capsaicin-evoked primary mechanical allodynia (a) but not secondary mechanical allodynia (b) is enhanced in CKO mice. LC, littermate control. \* $P < 0.05$ , vs. LC mice, two-way ANOVA, followed by post-hoc Bonferroni test.  $n = 6$  mice/group. All data are expressed as mean  $\pm$  S.E.M.

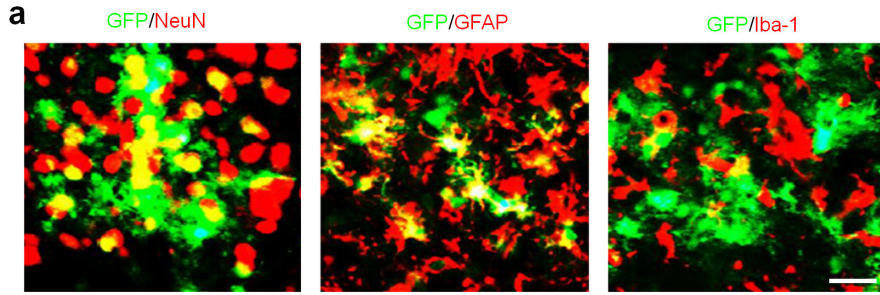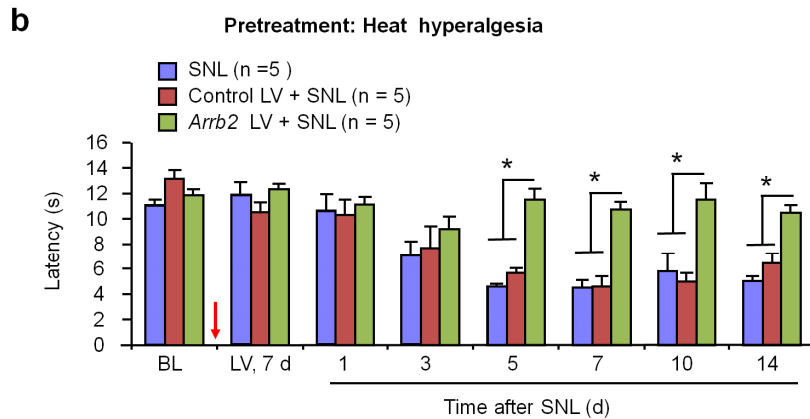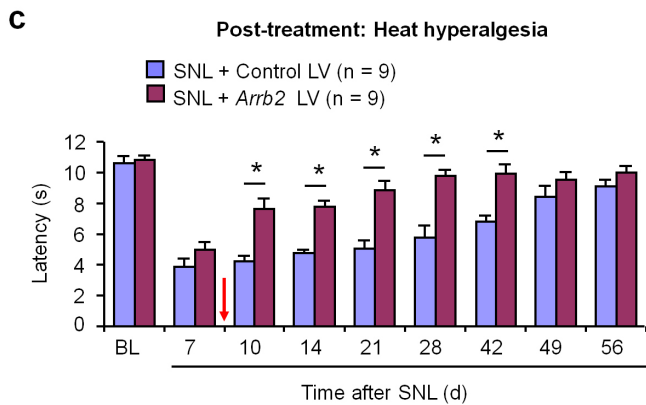

**Supplementary Figure 7. Overexpression of *Arrb2* in SDH prevents and reverses heat hyperalgesia in WT mice after SNL**

(a) Spinal microinjections of GFP-labeled lenti virus (LV) infect many neurons (NeuN<sup>+</sup>), some astrocytes (GFAP<sup>+</sup>), and few microglia (Iba-1<sup>+</sup>) in SDH. Scale, 20  $\mu$ m. (b) Prevention of spinal nerve ligation (SNL)-induced heat hyperalgesia by intra-spinal pretreatment of *Arrb2*-lentivirus (*Arrb2*-LV) via microinjections, given one week before SNL. \* $P$ <0.05, two-way ANOVA,  $n = 5$  mice/group. (c) Reversal of SNL-induced heat hyperalgesia by intra-spinal post-treatment of *Arrb2*-LV, given one week after SNL. \* $P$ <0.05, two-way ANOVA, followed by post-hoc Bonferroni test.  $n = 9$  mice/group. All data are expressed as mean  $\pm$  S.E.M.

Full length western blots of Figure 3a

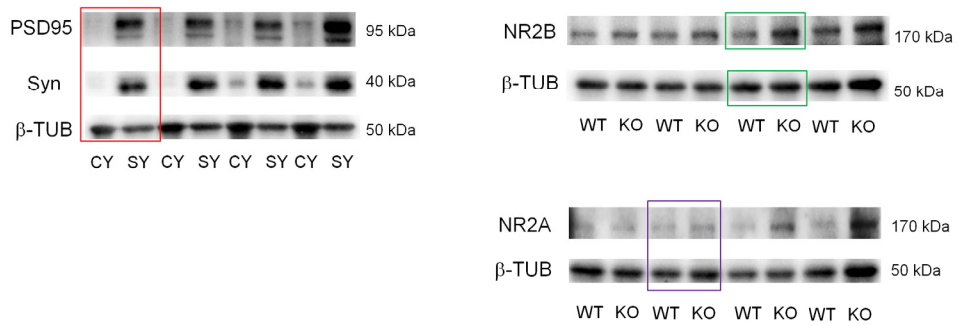

Full length western blots of Figure 3c

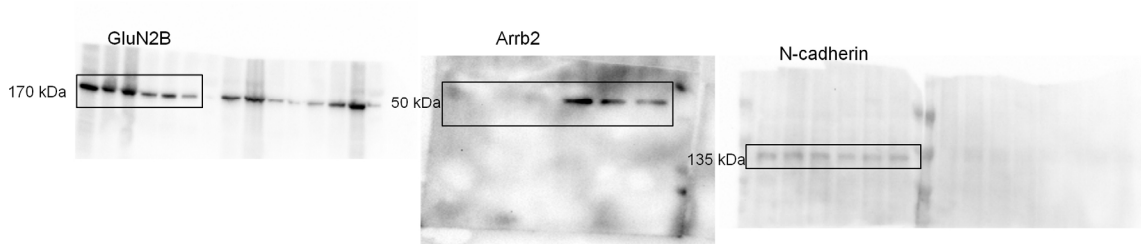

Full length western blots of Figure 3e

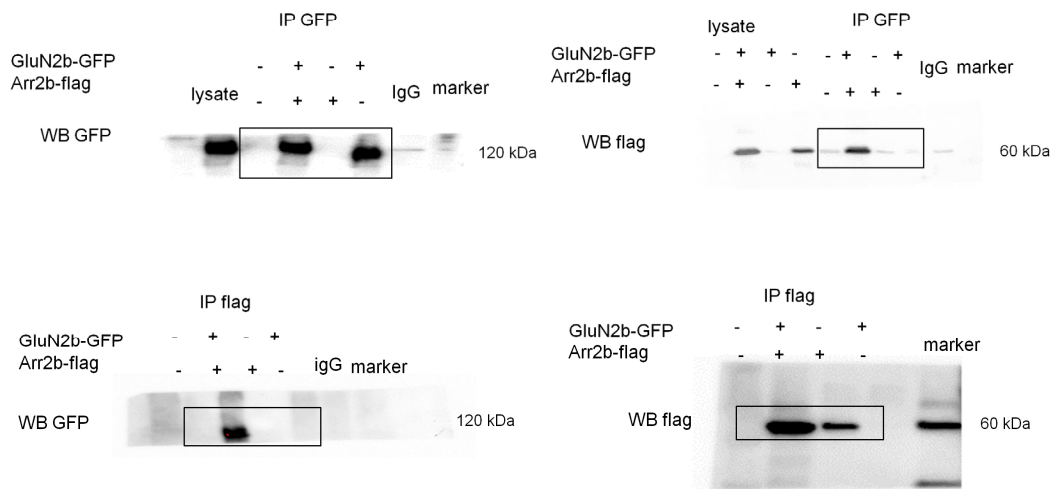

**Supplementary Figure 8a.** Full size western blots of Figure 3a, 3c and 3e, obtained from the respective boxes. Cy, cytosol; Sy, synaptosome; NR2A, GluN2A; NR2B, GluN2B.



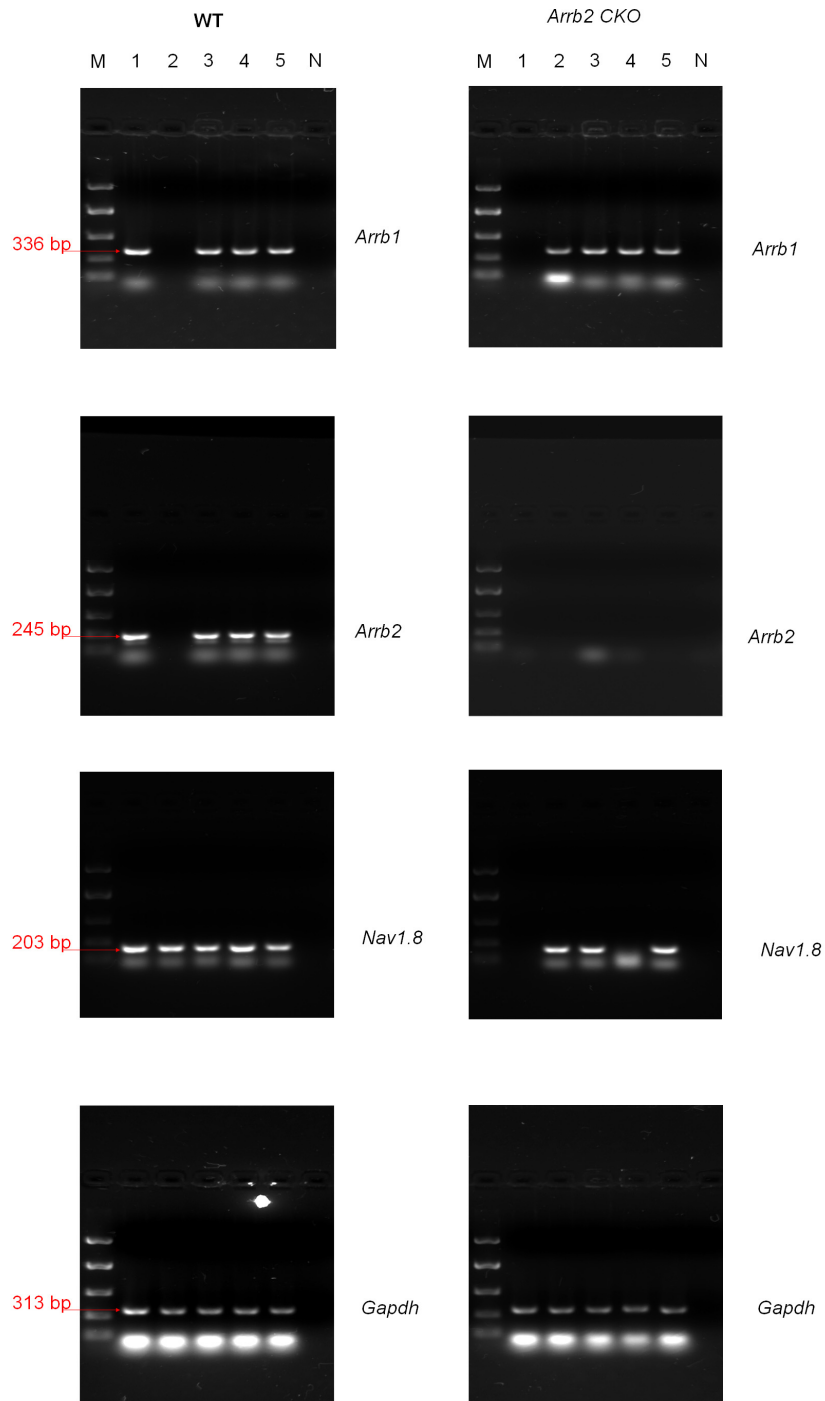

**Supplementary Figure 8b.** Full size gels of Figure 7a.

Full length western blots of Supplementary Figure 2a

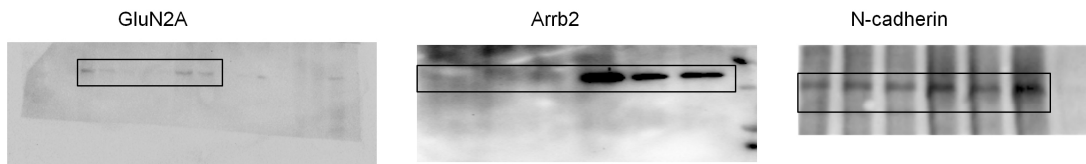

Full length western blots of Supplementary Figure 2c

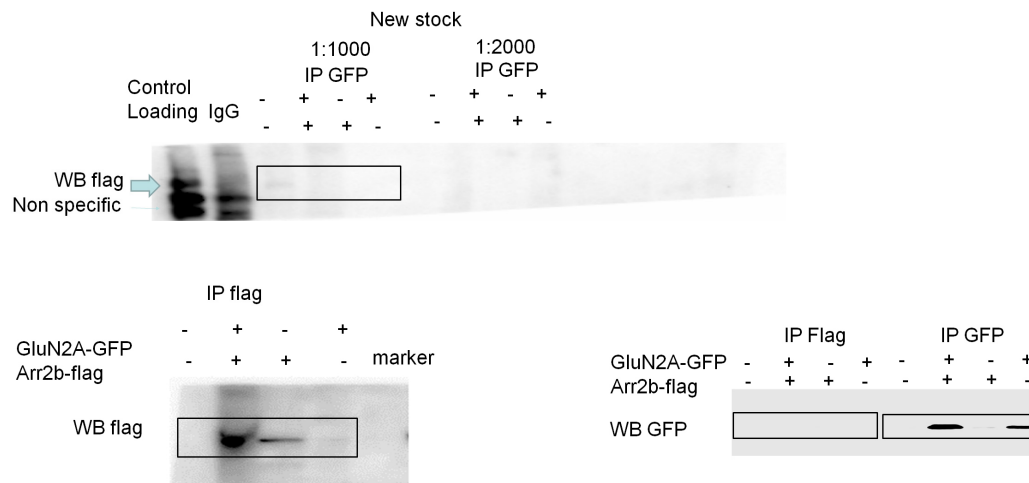

**Supplementary Figure 8c.** Full size western blots of Supplementary Figure 2a and 2c.

**Supplementary Table 1.** Sample sizes and number of animals used in this study.

| Experiment                | Sample size      | Number of Groups | Number of samples    | Number of mice |
|---------------------------|------------------|------------------|----------------------|----------------|
| <b>1. In vivo</b>         |                  |                  |                      |                |
| 1.1 Behavioral test       | n = 4-14 mice    | 53               | 282 mice             | 282            |
| 1.2 WB                    | n = 4 mice       | 2                | 8 mice               | 8              |
| 1.3 Immunohistochemistry  | n = 4 mice       | 2                | 8 mice               | 8              |
| 1.4 ISH                   | n = 4 mice       | 2                | 8 mice               | 8              |
| 1.5 RT-PCR                |                  |                  |                      |                |
| 1.5.1 Dorsal horn         | n = 5 mice       | 3                | 15 mice              | 15             |
| 1.5.2 Single cell         | n = 5 neurons    | 2                | 10 neurons           | 4              |
| <b>2. Ex vivo</b>         |                  |                  |                      |                |
| 2.1 Patch-clamp recording | n = 5-21 neurons | 32               | 243 neurons          | 115            |
| <b>3. In vitro</b>        |                  |                  |                      |                |
| 3.1 Hela cell culture     | n = 3 cultures   | 12               | 36 cultures          | 0              |
|                           |                  |                  |                      |                |
|                           |                  |                  | Total number of mice | <b>440</b>     |

**Supplementary Table 2.** List of primers for single-cell PCR.

| Target gene (Product length) <sup>a</sup> | Outer primers                                    | Inner primers                                    | Genbank No.  |
|-------------------------------------------|--------------------------------------------------|--------------------------------------------------|--------------|
| <i>Arrb1</i> (709 bp, 336 bp)             | AGGAGAGAGAAAGAGACAGAGG<br>GAGGAACAGAAACGGAGATGAG | CTCTTTGGGCCTCAGTTTCT<br>AGGTTGTTCCACACTTCTC      | NM_177231    |
| <i>Arrb2</i> (332 bp, 245 bp)             | GAACTCTGTGCGGCTTATCA<br>CCTTGCAGAACGTGGAACTA     | TGAAACCACAGCCACTT<br>TAGGAGACACCTGGTCATCTT       | NM_001271358 |
| <i>Nav1.8</i> (316 bp, 203 bp)            | CATGACAGAGGAGCAGAAGAAG<br>CCAGCCGTTGGTGAAGTAATA  | CTTTGAATAAGTACCAGGGCTTC<br>GAACATCTTCATCACACTCG  | NM_001205321 |
| <i>Gapdh</i> (367 bp, 313 bp)             | AGCCTCGTCCCCTAGACAAAA<br>TTTTGGCTCCACCCCTTCA     | TGAAGGTCGGTGTGAACGAATT<br>GCTTTCTCCATGGTGGTGAAGA | XM_001473623 |

<sup>a</sup> (n, n) indicates product size obtained from outer and inner primers, respectively.
